## 1            **Culturing primary neurons from rat hippocampus and cortex**

2

3    *Madhusmita Priyadarshini Sahu, Outi Nikkilä, Seija Lågas, Sulo Kolehmainen and Eero Castrén*

4    Neuroscience Center, Helsinki Institute of Life Science HiLIFE, University of Helsinki, 00290

5    Helsinki, Finland

6

### 7    **Abstract**

8    Primary neurons from rodent brain hippocampus and cortex has served as great tools in biomedical  
9    research over the years. However, protocols for the preparation of primary neurons vary, which often  
10    leads to conflicting results. This report provides a robust and reliable protocol for the production of  
11    primary neuronal cultures from the cortex and hippocampus with minimal contribution of non-  
12    neuronal cells. The neurons were grown in serum free media and maintained for several weeks  
13    without any additional feeder cells. The neuronal cultures maintained according to this protocol  
14    differentiate and by three weeks develop extensive axonal and dendritic branching. The cultures  
15    produced by this method show excellent reproducibility and can be used for histological, molecular  
16    and biochemical methods.

17

### 18    **Introduction**

19

20    Primary culture of rodent hippocampal or cortical neurons remains one of the fundamental methods  
21    of modern neurobiology. Primary neurons can be easily collected and over a few days or weeks  
22    differentiate into a culture with clearly separable axons, dendrites, dendritic spines and synapses. By  
23    modifying culture medium and conditions, numerous factors directing different aspects of neuronal  
24    survival, differentiation and phenotype have been revealed.

25

26    Several more or less thoroughly described protocols for cultures of primary neurons have been  
27    published over years. Original methods used serum to support neuronal survival and differentiation  
28    (1) but more recently culture methods using defined media without serum have been introduced (2,  
29    3, 4 2, 1490-8, 5). Glial cells provide critical support to cultured neurons (6 277, 1684-7, 7 468, 223-  
30    31, 8), and methods to keep excess glial proliferation in check or to prevent mixing between neurons  
31    and glia have been published (9 1, 2406-15).

32

33    One of the disadvantages of primary culture is that they do not divide in culture and need to be  
34    generated from embryonic or early postnatal brains every time. Moreover, successful dissection and

35 preparation of cultures requires substantial skill and experience. Over several decades, cell lines have  
36 been discovered and created that mimic many or most of the features of primary neurons (10 5, 327-  
37 30, 11), and more recently, differentiated stem cells from rodents (12) or humans (13) have been  
38 introduced as alternatives for primary cultures, but none of these have replaced embryonic primary  
39 neurons from their position as a gold standard for neuronal cultures.

40

41 Neuronal cultures, however, vary vastly depending on source, age of derivation and culture  
42 conditions. Results obtained by a culture protocol used in one lab may not be reproducible in another  
43 lab, which adds to the ongoing discussion about reproducibility crisis. We have over more than a  
44 decade developed and refined a culture protocol of primary neurons derived from E17 rat embryos,  
45 which has been successfully used in several publications (14, 15). Here, we describe this protocol,  
46 necessary materials and methods as well as the characteristics of neurons derived through it in detail  
47 and share the protocol with other groups with the aim to promote reproducibility and rigor.

48

## 49 **Materials and Methods**

50

### 51 *Animals*

52

53 Pregnant female rats were obtained from Envigo (Harlan Labs,UK). The plug date of the female rats  
54 was marked E0. All embryos staged at E17-18 from the female rats were used in the experiments.  
55 Animals were kept in standard conditions (temperature 22°C, 12-hour light/dark cycle). Food and  
56 water were available ad libitum. All the experiments were performed according to institutional  
57 guidelines (University of Helsinki internal license number: KEK17-016)

58

### 59 *Composition of different solutions used*

60

- 61 1. PBS buffer with pH= 7.4 consist of 80g NaCl, 0,2g KCl, 14g Na<sub>2</sub>HPO<sub>4</sub> x 2H<sub>2</sub>O, 2g KH<sub>2</sub>PO<sub>4</sub>  
62 in 1-liter Milli Q water. The final solution was autoclaved.
- 63 2. Preparation medium contains HBBS, 1mM sodium puruvate, 10 mM HEPES and the final ph  
64 7, 2.
- 65 3. DMEM++ contained DMEM, 10% Fetal Bovine Serum, 1% L-glutamine, 1% penicillin-  
66 streptomycin
- 67 4. Papain solution included 0.5 mg papain, 10 µg DNase I in 5ml Papain Buffer. The stock  
68 Papain buffer comprised of 1mg DL-Cystein HCl, 1mg BSA, 25mg Glucose in 5ml PBS

- 69 5. Trituration medium consists of 10  $\mu\text{g}$  Dnase I in 10ml Preparation medium as above.
- 70 6. Growing medium consists of Neurobasal medium, 2% B27 supplement, 1% L-glutamine, 1%  
71 penicillin-streptomycin
- 72 7. Poly-L-lysine working solution was made at 1:10 dilution Poly-L-lysine in MilliQ water
- 73 8. 4% PFA consists of 40 g paraformaldehyde in 1 litre PBS (1). The final solution was filtered.
- 74 9. PBST consists of 0.3% Triton X-100 in PBS
- 75 10. Blocking buffer consists of 1% BSA, 4% normal goat serum, 0.3% Triton-X100 in PBS
- 76 11. Primary antibodies used were GFAP, NeuN and MAP2 at 1:1000 dilution in the blocking  
77 buffer.
- 78 12. Secondary antibodies were Goat Anti Rabbit 647, Goat Anti Mouse 568, and Goat Anti  
79 Chicken 488 diluted 1:1000 in blocking buffer.

80

### 81 ***Extraction procedures***

82

83 Timed pregnant female rats were terminally anesthetized with carbon dioxide. Abdominal skin was  
84 washed with 70% ethanol followed by opening of the peritoneal cavity (Video file- 1). Amniotic sacs  
85 were exposed with fine scissors and embryos were taken out from the uterus. These embryos were  
86 transferred to 50 ml tube with PBS on ice. The heads were immediately moved to ice-cold PBS. Brain  
87 dissection was performed in the preparation medium (2) on 60 mm petridish on ice. For precise  
88 identification of the brain structures, the cortex and hippocampus dissection were performed under  
89 the light microscope at room temperature. Step by step dissection has been compiled in a series of  
90 video files supplied as supplementary video files (Video files 2- 5). The cortex tissue was let to  
91 recover in 10 ml DMEM (3) on a 90 mm petridish. The hippocampus was added into the preparation  
92 medium (2) on 35 mm petridish on ice. Cells were handled separately according to the following  
93 instructions. From here onwards, all the experiments were carried out under sterile conditions.

94

### 95 **Cell preparation for hippocampus:**

- 96 1. Pre-coat multi-well plates (for biochemical assays) or round coverslips within a 4-well plate  
97 (for staining) overnight with Poly-L-lysine (7), 10  $\mu\text{g}/\text{ml}$  at 37°C. Next day, before plating,  
98 wash the plates twice with PBS.
- 99 2. Transfer the dissected hippocampus tissue into pre-warmed papain solution (4) at +37°C.
- 100 3. Incubate the tissue for 5-10 min at +37°C. After the tissue sinks to the bottom, excess of papain  
101 solution is discarded.

- 102 4. Cells were triturated in about 3 ml trituration medium (5) with 20G needle with 10 ml syringe  
103 10 times. Let the undissociated tissue sink to the bottom for about 30-60 sec. Transfer the  
104 supernatant to a fresh 15 ml tube.
- 105 5. Repeat trituration 2-3 times.
- 106 6. Centrifuge for 5 min at 900 rpm/154 g in Centrifuge 5810 (Eppendorf).
- 107 7. Remove the supernatant and resuspend the cell pellet in fresh growing medium (6). The  
108 hippocampal cells were diluted to 1:10 (5  $\mu$ l +45  $\mu$ l growing media). 10  $\mu$ l of the diluted cells  
109 was plated into the disposable hemocytometer. Cell counting was done under a light  
110 microscope and using a manual cell counter.
- 111 8. For immunostaining, we typically use 50 000 cells per 1.9 cm<sup>2</sup> coverslip within a 4-well plate.  
112 The cells were let to grow in +37°C (5% CO<sub>2</sub>). Dilute and plate at a density of 3 000- 500 000  
113 cells in different well format of 4, 12, 24 or 96 well plate, depending on the duration and  
114 purpose of the experiment.

115

#### 116 **Cell preparation for cortex:**

- 117 1. Pre-coat multi-well plates (for biochemical assays) or coverslips within a 4-well plate (for  
118 staining) overnight with Poly-L-lysine (7), 10  $\mu$ g/ml at 37°C. Next day, before plating, wash  
119 the plates twice with PBS.
- 120 2. Triturate cortex in DMEM (3) with 20G needle with 10 ml syringe 12-15 times (Video file-  
121 6).
- 122 3. Centrifuge 5 min at 900 rpm/154g.
- 123 4. Re-suspend the cell pellet in 2ml/brain DMEM (3), let it sit down for 2-3 minutes to allow  
124 unwanted residue to sediment.
- 125 5. Pre-plate the supernatant on 90mm Petri dish. This is done to get clear of the glial cells by  
126 allowing them to attach to the bottom of the plate. Incubate the cells at +37°C, 5% CO<sub>2</sub> for  
127 30 min.
- 128 6. Carefully remove the supernatant, avoid taking the attached cells from the bottom of the plate.
- 129 7. Centrifuge 5 min at 900 rpm. Resuspend the pellet in growing medium (5). Let it sit down 2-  
130 3 min to sediment the debris.
- 131 8. Remove the cell suspension into a new tube.
- 132 9. Count cells using the 0.4% of Trypan Blue dye . The cortical cells were used at 1:20 dilution  
133 (5 $\mu$ l +75  $\mu$ l growing medium +20 $\mu$ l trypan blue) for cell counting. The cell counting was  
134 done similarly as the hippocampal cells.

135 10. For immunostaining, we typically use 50 000 cells per 1.9 cm<sup>2</sup> coverslip within a 4-well plate.  
136 The cells were let to grow in +37°C (5% CO<sub>2</sub>). Dilute and plate at a density of 3 000- 500 000  
137 cells in different well format of 4, 12, 24 or 96 well plate, depending on the duration and  
138 purpose of the experiment.

139 Both the cell types were grown for 7, 14 and 21 days at +37°C with 5% CO<sub>2</sub> incubator. Cells were  
140 fixed at respective time points with 4% PFA (8) for 15 minutes followed by quick wash with PBS.

141

## 142 **Immunohistochemistry**

- 143 1. The 4 well plates were washed 3x5 min with PBST (9).
- 144 2. The fixed cells were blocked with blocking buffer (10) for 1 hour at room temperature.
- 145 3. Blocking buffer was washed away and primary antibody (11) prepared in the blocking buffer  
146 (9) was added. This was left on shaker at +4°C overnight.
- 147 4. The antibody was removed and washed 3x10 minutes with PBST.
- 148 5. After washing the secondary antibody prepared in the same blocking buffer was added to the  
149 wells at a dilution of 1:1000. The cells were left o/n on shaker at +4°C. The plates were  
150 covered with foil to protect from light.
- 151 6. The secondary antibody was washed with 1x10 minutes PBST followed by 2x10 minutes  
152 with PBS.
- 153 7. The coverslips were cleaned in MilliQ and mounted using mounting media on to the  
154 microscope slides.
- 155 8. The slides are stored in dark protected from light at +4°C until further use.

156

## 157 **Imaging**

158 The cells attached onto the coverslips were mounted on Superfrost slides (Thermo Scientific). The  
159 whole slide imaging was performed using Histoscanner (3D HISTEC Ltd., Hungary) at the genome  
160 biology unit, Biomedicum Helsinki. The images were analyzed using panoramic viewer software (3D  
161 HISTEC Ltd., Hungary). Four coverslips for each stage was scanned. Cell counting was performed  
162 using ImageJ software (<https://imagej.nih.gov>). Cells from a single focal plane was analyzed for an  
163 area of 4 mm<sup>2</sup> per image per coverslip. Five images from each coverslip was counted and averaged.  
164 The high magnification images were acquired using a Zeiss LSM 880 confocal microscope, at the  
165 Biomedicum Imaging unit, Biomedicum Helsinki. The lasers used were Alexa 488, Alexa 565, Alexa  
166 647 and Alexa 405. To minimize crosstalk between different channels, the images were acquired by  
167 sequential scanning. The most commonly used algorithm for image acquisition was the maximum

168 projection. The maximum intensity method is useful in extracting and detecting finer structures in a  
169 three-dimensional mode.

170

### 171 **Statistical analysis**

172 All the data was analyzed using the GraphPad Prism 6 software (La Jolla, CA, USA). The groups  
173 were compared using One-way ANOVA. All the data are represented as means  $\pm$  SEM.

174

### 175 ***Cell maintenance***

176 Cells were grown at +37°C in incubator (Heraeus, model Heracell) with 5% CO<sub>2</sub> gas. Half of the  
177 growing medium was changed once a week. The cell density was 50 000 cells in 1.9 cm<sup>2</sup> area. The  
178 cells have been fixed at different time points at 7, 14 or 21 DIV.

179

### 180 **Results**

181 The cell culture method described here has been developed and used in our lab for over a decade. The  
182 quality of neurons has been high and reproducible over the period of time. The overall procedure is  
183 outlined in the Figure 1. The extraction of the pups was performed under semi-sterile conditions  
184 within the animal facility (Fig 1A). The brain extraction and dissection were performed in a laminar  
185 hood under sterile conditions (Fig 1 B). The trituration was performed separately for hippocampal  
186 neurons and cortical neurons (Fig 1C). The quality of the cell dissociation was assessed by diluting  
187 and counting the cells using the hemocytometer (Fig 1D). The cortical cells were dyed with trypan  
188 blue to detect dead cells. The cortical cells along with the dye was used  
189 for cell counting (Fig 1Db).

190

191 The markers for cell staining was selected to identify neurons from glial cells if any were present.  
192 The level of maturation of these cells was studied using the dendritic markers. The cells were stained  
193 for markers such as NeuN (stains neuronal nuclei), GFAP (stains glial cells) and Map2 (stains  
194 neuronal somato-dendritic compartment) at three different time points. The density of cells was about  
195 50,000 cells for both hippocampal and cortical cells. In the cortical cells, no GFAP positive cells were  
196 detected at 7DIV and 14DIV. At 21DIV the GFAP cells formed 4% of the total cell population in the  
197 primary cortical cells (Fig- 3a). The number of cortical neurons sharply decline at 21DIV. For primary  
198 hippocampal neurons, the number of GFAP positive cells were 2% at 7DIV, 6% at 14DIV and 28.5%  
199 at 21DIV of the total cell population (Fig- 3b). The dendritic branching in both the cells increase from  
200 7DIV until 21DIV (Fig - 4).

201

## 202 **Discussion**

203 The primary neuronal cell culture is an ideal system for investigating cellular mechanisms at a higher  
204 resolution. The current protocol generates relatively pure neuronal cultures with maximum  
205 reproducibility and minimal contribution of glial cells. In this method we have cultured the neurons  
206 for 3 weeks without any additional feeder cells. For cell dissociation we have used papain only for  
207 hippocampal cells rather than trypsin, while cortical cells were dissociated by trituration without any  
208 prior enzymatic digestion. It has been observed that trypsin digestion of tissue leads to RNA  
209 degradation (16). The cortical cells recover from mechanical dissociation through a short incubation  
210 at 37°C in DMEM with serum. The growth of non-desired cells, especially glial cells have been  
211 minimized in this study. This has been achieved by incubating at 37 °C and carefully removing the  
212 supernatant containing unadulterated cortical neurons. Low levels of glia are important especially if  
213 neurons will be used for biochemical analysis. However, it is well known that in the complete absence  
214 of glia, neurons fail to make efficient synapses (6), so a small percentage of glial cells is an advantage.  
215 These cells could be grown on coverslips for staining purposes. For biochemical methods, the wells  
216 were directly coated with poly-L-Lysine overnight. After washing away the poly-L-Lysine, cells were  
217 plated directly into it.

218

219 The cell lines have been the largest source for medical research in the past due to their immortal  
220 nature. These immortal cell lines have resulted with variable results arising after different passage  
221 times. This has been described as genetic drift as cells are passaged (17). The primary cells lack the  
222 immortality factor and therefore are the best *in vitro* models for biomedical research of the nervous  
223 system. These cells are genetically more stable than neuronal cell lines. The primary cells in culture  
224 maintain many crucial markers and functions as seen *in vivo*. Thus, they complement the *in vivo*  
225 experiments allowing for more controlled manipulation of cellular functions and processes. Once  
226 neurons are cultured, advanced molecular and biochemical study is easy to perform. For example,  
227 successful CRISPR-cas9 gene editing has been achieved using primary neuronal cultures (18).  
228 Furthermore, the cellular dynamics can be easily monitored through live imaging and  
229 electrophysiology. These features have established primary neurons as an essential tool for drug  
230 testing, with an additional advantage of reduced animal usage. However, variability in preparation  
231 methods reduces reproducibility of data, therefore, we hope that the method published here could be  
232 adopted by several research group for reliable and reproducible culturing of primary neurons.

233

## 234 **Abbreviations**

235

236 E17- Embryonic day 17, DIV- Days *in vitro*, NeuN- neuronal nuclei, GFAP- Glial fibrillary acidic  
237 protein, Map2- Microtubule Associated Protein 2,

238

### 239 **Author contribution list**

240

241 MS and EC designed the experiments and wrote the manuscript. MS, ON and SL performed the  
242 experiments. SK edited the video files.

243

### 244 **Acknowledgements**

245

246 The authors do not declare any conflict of interest. This work was financially supported by ERC  
247 grant #322742 – iPLASTICITY, the Sigrid Juselius Foundation, and Academy of Finland grants  
248 #294710 and #307416 to EC.

249

250

### 251 **References**

252

253 1.Banker GA, Cowan WM. Rat Hippocampal Neurons in Dispersed Cell-Culture. Brain Research.  
254 1977;126(3):397-425.

255 2.Bottenstein JE, Sato GH. Growth of a Rat Neuroblastoma Cell Line in Serum-Free Supplemented  
256 Medium. Proceedings of the National Academy of Sciences of the United States of America.  
257 1979;76(1):514-7.

258 3.Brewer GJ, Cotman CW. Survival and Growth of Hippocampal-Neurons in Defined Medium at Low-  
259 Density - Advantages of a Sandwich Culture Technique or Low Oxygen. Brain Research.  
260 1989;494(1):65-74.

261 4.Brewer GJ, Torricelli JR. Isolation and culture of adult neurons and neurospheres. Nature  
262 Protocols. 2007;2(6):1490-8.

263 5.Seibenhener ML, Wooten MW. Isolation and Culture of Hippocampal Neurons from Prenatal Mice.  
264 Jove-J Vis Exp. 2012(65).

265 6.Pfrieger FW, Barres BA. Synaptic efficacy enhanced by glial cells in vitro. Science.  
266 1997;277(5332):1684-7.

267 7.Eroglu C, Barres BA. Regulation of synaptic connectivity by glia. Nature. 2010;468(7321):223-31.

268 8.Banker GA. Trophic Interactions between Astroglial Cells and Hippocampal-Neurons in Culture.  
269 Science. 1980;209(4458):809-10.

270 9.Kaech S, Banker G. Culturing hippocampal neurons. Nature Protocols. 2006;1(5):2406-15.

271 10.White LA, Whittemore SR. Immortalization of Raphe Neurons - an Approach to Neuronal  
272 Function-Invitro and Invivo. J Chem Neuroanat. 1992;5(4):327-30.

273 11.Greene LA, Tischler AS. Establishment of a Noradrenergic Clonal Line of Rat Adrenal  
274 Pheochromocytoma Cells Which Respond to Nerve Growth-Factor. Proceedings of the National  
275 Academy of Sciences of the United States of America. 1976;73(7):2424-8.

276 12.Bibel M, Richter J, Lacroix E, Barde YA. Generation of a defined and uniform population of CNS  
277 progenitors and neurons from mouse embryonic stem cells. Nature Protocols. 2007;2(5):1034-43.

278 13.Moe MC, Varghese M, Danilov AI, Westerlund U, Ramm-Petersen J, Brundin L, et al. Multipotent  
279 progenitor cells from the adult human brain: neurophysiological differentiation to mature neurons.  
280 Brain. 2005;128:2189-99.



- 281 14. Antila H, Autio H, Turunen L, Harju K, Tammela P, Wennerberg K, et al. Utilization of in situ ELISA  
282 method for examining Trk receptor phosphorylation in cultured cells. *Journal of Neuroscience*  
283 *Methods*. 2014;222:142-6.
- 284 15. Rantamaki T, Vesa L, Antila H, Di Lieto A, Tammela P, Schmitt A, et al. Antidepressant Drugs  
285 Transactivate TrkB Neurotrophin Receptors in the Adult Rodent Brain Independently of BDNF and  
286 Monoamine Transporter Blockade. *Plos One*. 2011;6(6).
- 287 16. Vrtacnik P, Kos S, Bustin SA, Marc J, Ostanek B. Influence of trypsinization and alternative  
288 procedures for cell preparation before RNA extraction on RNA integrity. *Anal Biochem*.  
289 2014;463:38-44.
- 290 17. Ben-David U, Siranosian B, Ha G, Tang H, Oren Y, Hinohara K, et al. Genetic and transcriptional  
291 evolution alters cancer cell line drug response. *Nature*. 2018;560(7718):325-30.
- 292 18. Swiech L, Heidenreich M, Banerjee A, Habib N, Li YQ, Trombetta J, et al. In vivo interrogation of  
293 gene function in the mammalian brain using CRISPR-Cas9. *Nature Biotechnology*. 2015;33(1):102-  
294 U286.

295  
296

### 297 **Figure legends**

298

299 Figure 1: The procedure for extracting neuronal cells from the intact animal tissue.

300 A. This part of the procedure was performed in the animal facility a- opening the visceral cavity of  
301 the rat, b- extracting the pups, c- collecting the pups into sterile PBS. B. This procedure was performed  
302 in the sterile laminar hood. a-c Extraction of the brain from the pups, d-e dissecting the cortex and  
303 hippocampus from the brain. C. Trituration of the tissue to produce homogenous cells, a-c  
304 hippocampal neurons and d-f cortical neurons. D. Cell counting using the Bürker slide, a-  
305 hippocampal neurons, b- cortical neurons with trypan blue.

306

307 Figure 2: Culturing cortical and hippocampal neurons at different time points. A-C Cortical neurons  
308 at 7DIV (A), 14DIV (B) and 21DIV (C). D-F- Hippocampal neurons at 7DIV (D), 14DIV (E) and  
309 21DIV (F). The neurons are stained with NeuN (red), Map2 (green) and GFAP (grey).

310

311 Figure 3: Cell counting in both hippocampal and cortical cells using markers for neurons (NeuN),  
312 astrocytes (GFAP) and a dendritic cell marker, Map2. The cell counting numbers of the representative  
313 markers in cortical neurons (A) and hippocampal neurons (B).

314

315 Figure 4: Higher magnification image of the cells stained for markers Map2 and NeuN. The Map2  
316 branching increase at 14DIV and at 21DIV with more tertiary branches being observed both in the  
317 cortical cells (A) and hippocampal cells (B).

318

319 **Table-1 Detailed protocol about materials**

| <b><i>Reagents</i></b>                                                  | <b><i>Equipments and Surgical instruments</i></b>       | <b><i>Other materials</i></b>                      |
|-------------------------------------------------------------------------|---------------------------------------------------------|----------------------------------------------------|
| NaCl (31434, Riedel)                                                    | Dissecting/stereo microscope (EZ4 HD, Leica)            | Petridish 90mm (101RT/C, Thermo Scientific)        |
| KCl (31248, Riedel)                                                     | CO <sub>2</sub> Incubator (Heracell, Heraeus)           | Petridish 60mm (628102, Greiner)                   |
| Na <sub>2</sub> HPO <sub>4</sub> x 2H <sub>2</sub> O (0326, J.T. BAKER) | Centrifuge 5810 (Eppendorf)                             | Petridish 35mm (627102, Greiner)                   |
| KH <sub>2</sub> PO <sub>4</sub> (4871, Merck)                           | Scissors (RU 1003-14 Rudolf)                            | Multidish 4 well plate (176740, Thermo Scientific) |
| HBBS (14170088, Gibco)                                                  | Spring scissors (15004-08 Fine Science Tools)           | Superfrost slides (J1800AMNT, Thermo Scientific)   |
| 100mM sodium puruvate (11360039, Gibco)                                 | Forceps (11000-13 Fine Science Tools)                   | Coverslips (Round 13mm, Thermo scientific)         |
| 1M HEPES ph 7,2 (101926, ICN)                                           | Curved forceps (11271-30/Dumont#7 Fine Science Tools)   | C-Chip Disposable Hemocytometer (Bürker, LabTech)  |
| DMEM (BE12-614F, BioWhittaker Lonza)                                    | Straight forceps (11295-10/Dumont#5 Fine Science Tools) | Microscope slides ( ECN 631-1551, VWR)             |
| Papain (P-4762, Sigma)                                                  |                                                         |                                                    |
| Dnase I (D4527, Sigma)                                                  |                                                         |                                                    |
| DL-Cystein HCl (C-9768, Sigma)                                          |                                                         |                                                    |
| BSA (A7638, Sigma)                                                      |                                                         |                                                    |
| D-(+)-Glucose anhydrous (49139, Fluka)                                  |                                                         |                                                    |
| PFA, Paraformaldehyde (1157, J.T. BAKER)                                |                                                         |                                                    |
| Poly-L-lysine (P4707, Sigma)                                            |                                                         |                                                    |
| Normal goat serum (16210-064, Lifetechnologies, Gibco)                  |                                                         |                                                    |
| Triton-X100((93426, Fluka)                                              |                                                         |                                                    |
| GFAP (12389, Cell Signaling Technology)                                 |                                                         |                                                    |
| NeuN (MAB377X, EMD Millipore)                                           |                                                         |                                                    |
| MAP2 (ab5392, Abcam)                                                    |                                                         |                                                    |
| Goat Anti Rabbit 647 (A21245, Life Technologies)                        |                                                         |                                                    |

|                                                 |  |  |
|-------------------------------------------------|--|--|
| Goat Anti Mouse 568 (A11004, Life Technologies) |  |  |
| Goat Anti Chicken 488 (A11039, LifeTecnologies) |  |  |
| Mounting media with DAPI (ab104139, Abcam)      |  |  |
| Trypan blue (T8154, Sigma)                      |  |  |

320

321

322

323

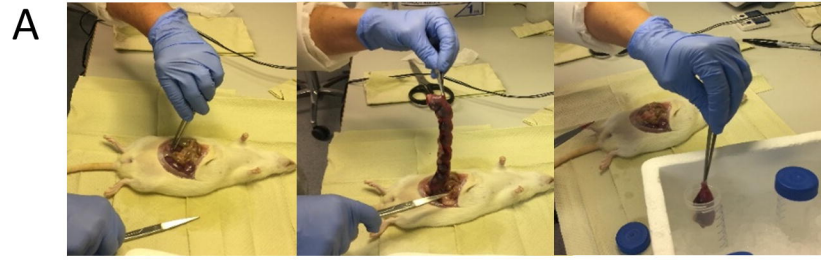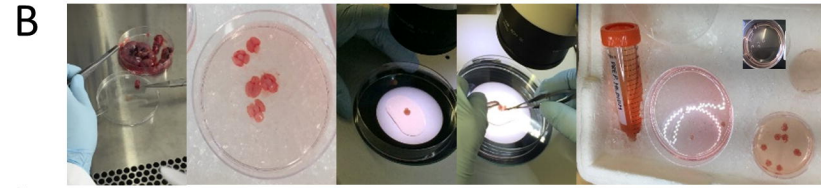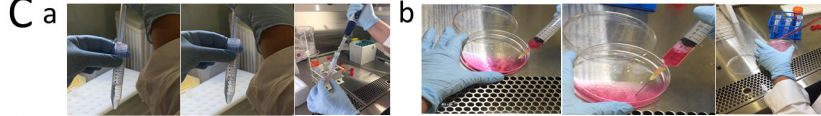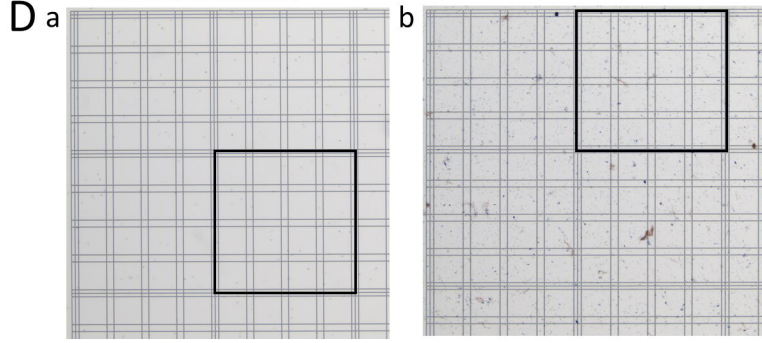

7DIV

14DIV

21DIV

Cortical cells

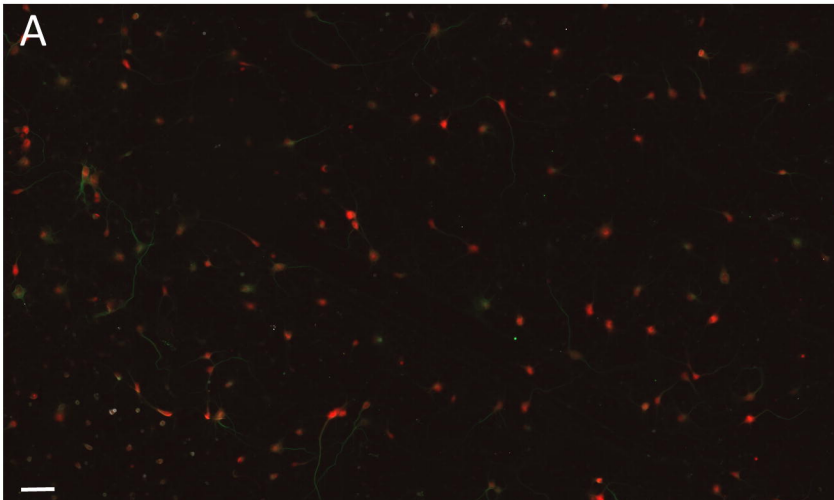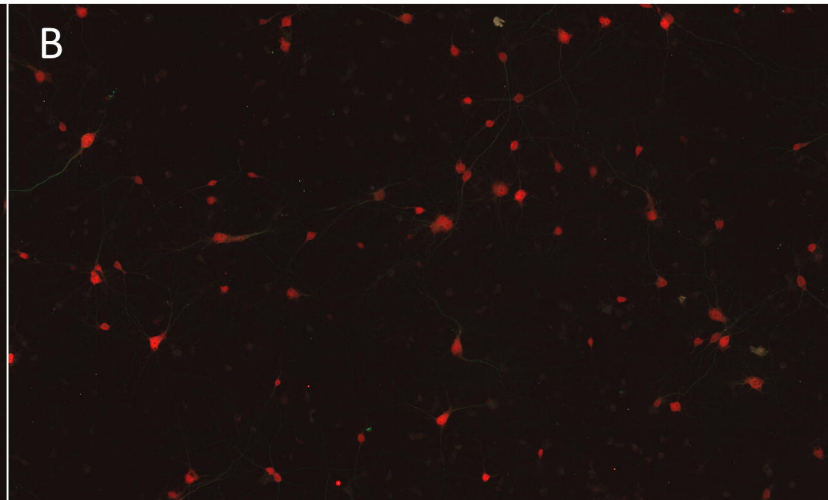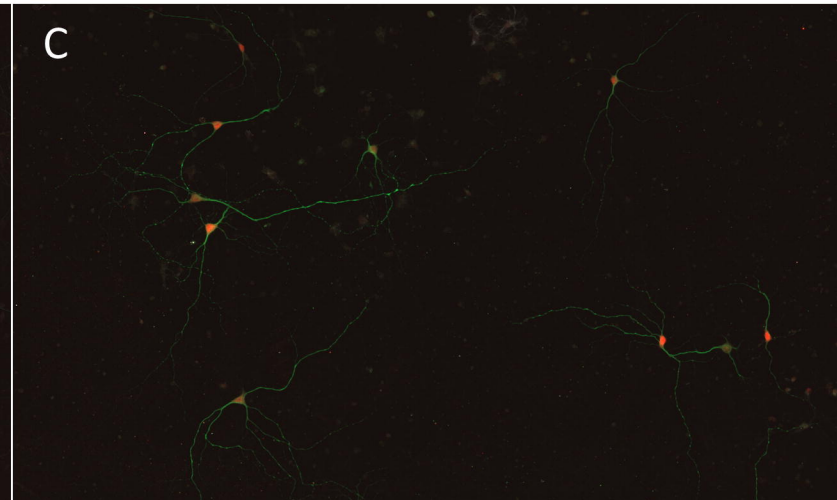

Hippocampal cells

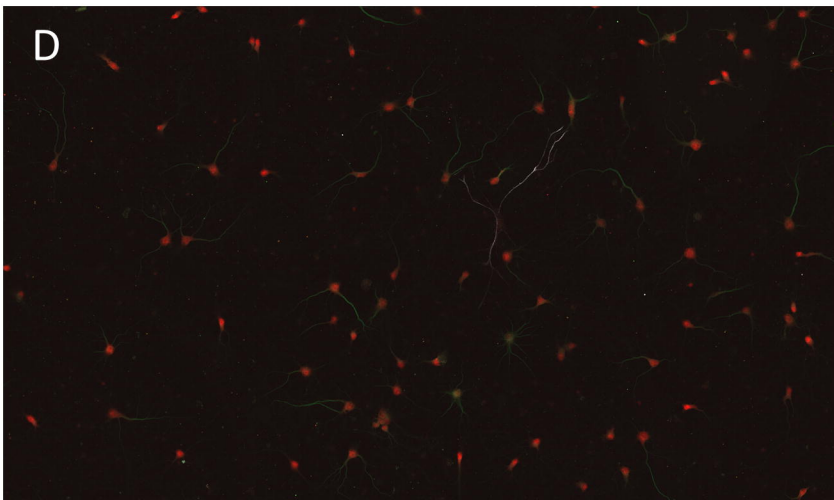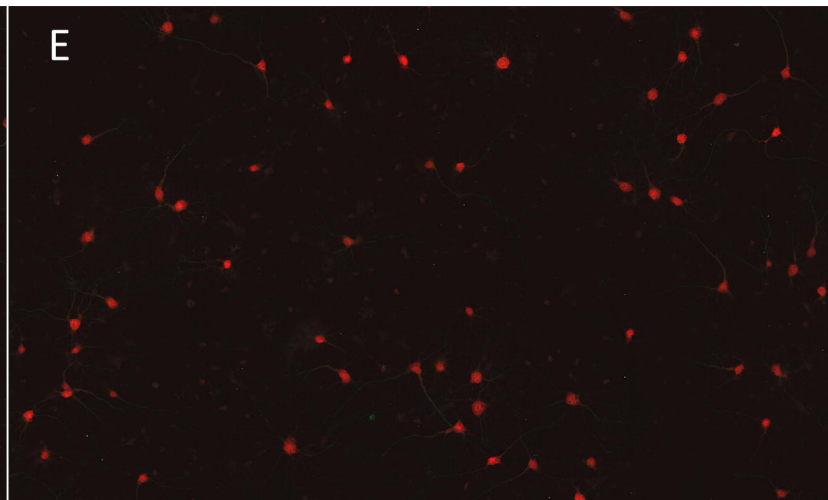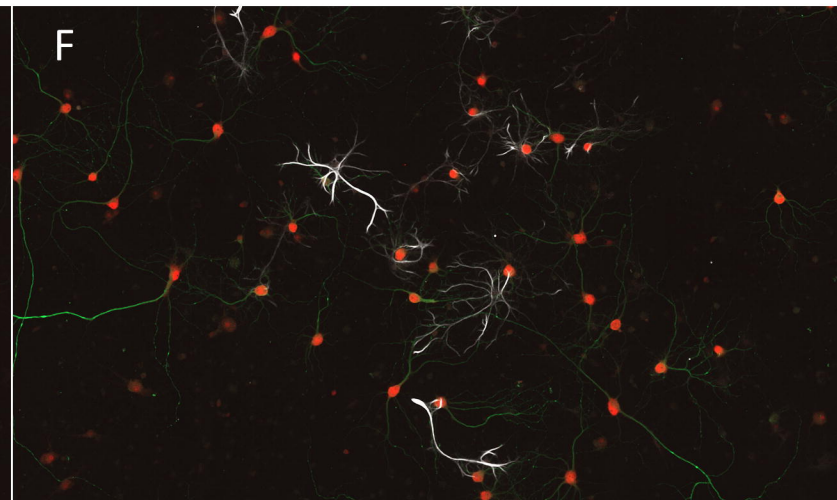

**A**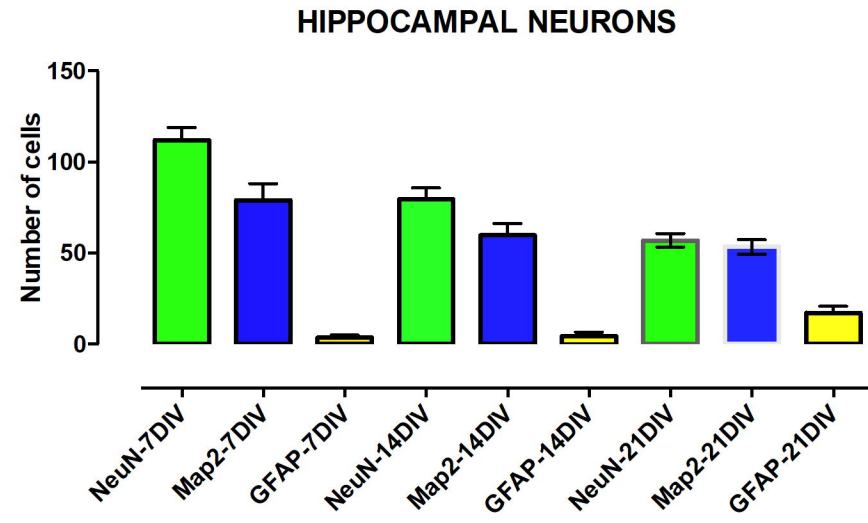**B**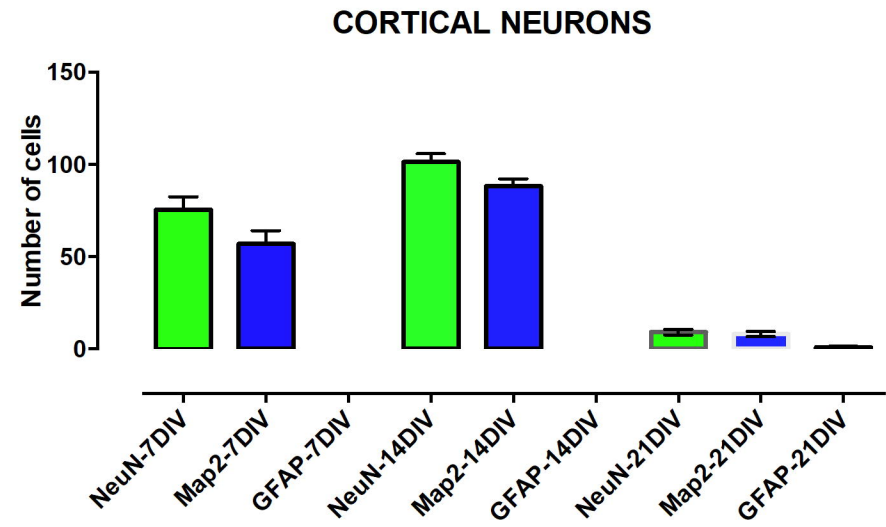

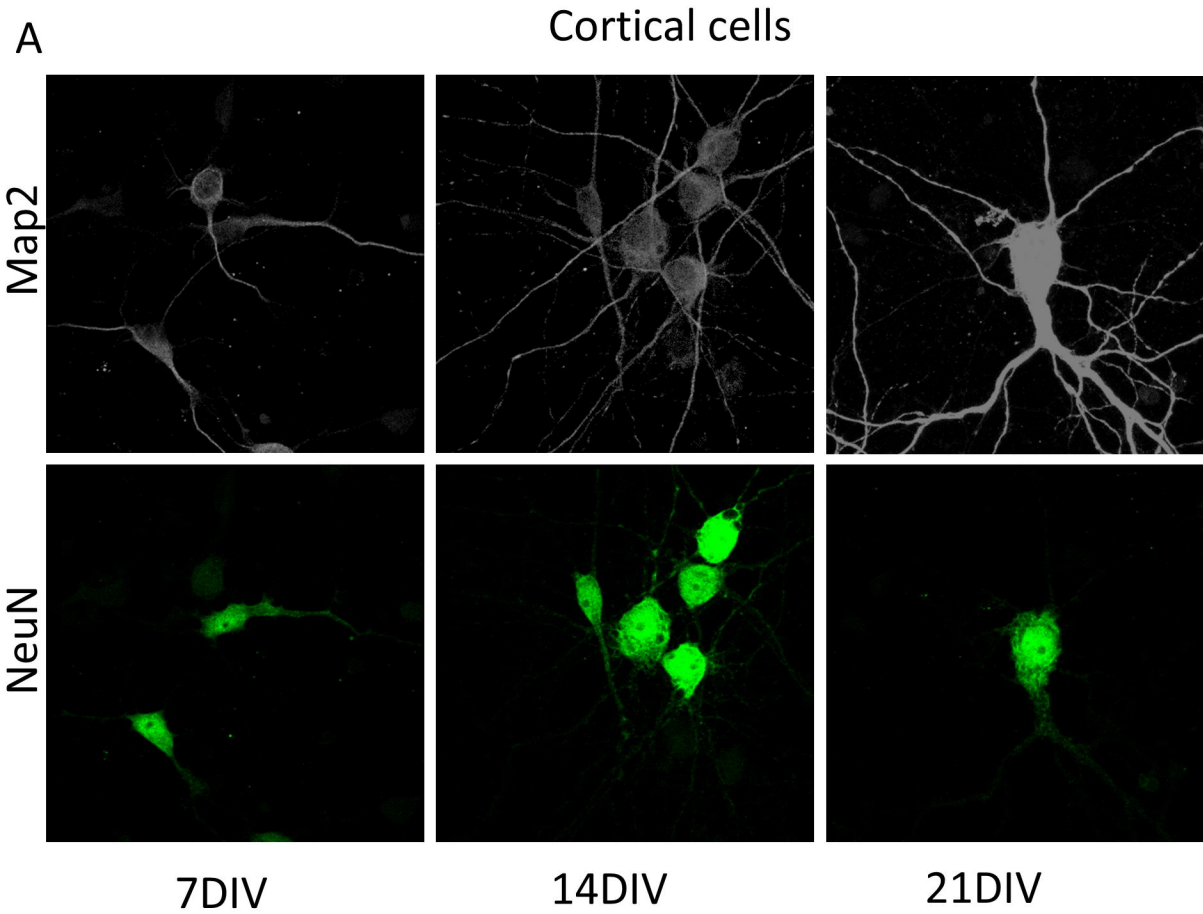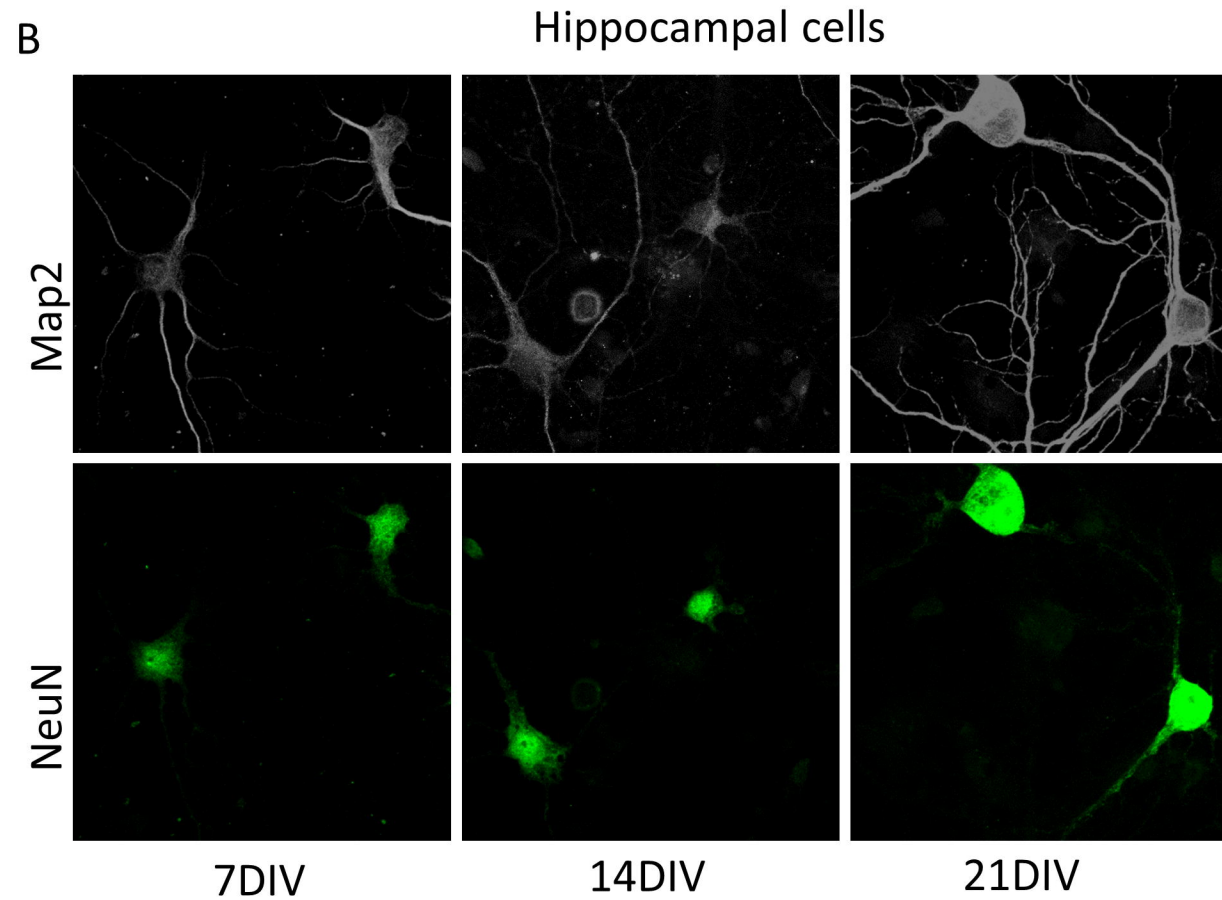

Source: http://biorxiv.org/content/10.1101/491118v2.full.pdf
